# Supplementary material
Source: publisher figshare collection journal article supplement (https://acs.figshare.com/ndownloader/files/9751285)
Supplement: Supplementary file 1 [file 9751285]

# Supporting Information

## **A 3D Printable and Mechanically Robust Hydrogel Based on Alginate and Graphene Oxide**

Sijun Liu, Anil Kumar Bastola, Lin Li\*

School of Mechanical and Aerospace Engineering, Nanyang Technological University,

50 Nanyang Avenue, Singapore 639798, Singapore

Email: [mlli@ntu.edu.sg](mailto:mlli@ntu.edu.sg)

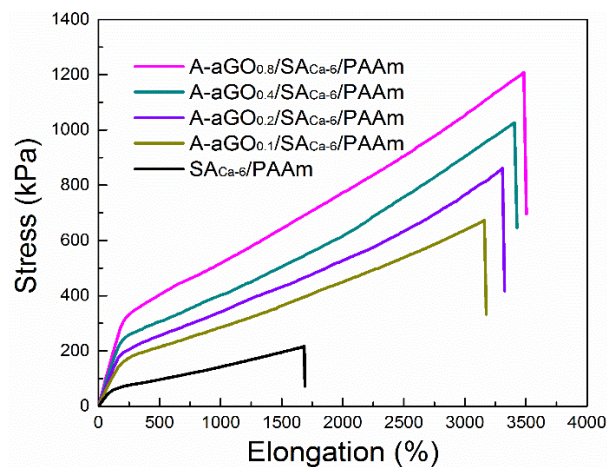

Figure S1. Effects of various A-aGO contents on the stress-elongation curves of the A-aGO/SA<sub>Ca-6</sub>/PAAm nanocomposite hydrogels.

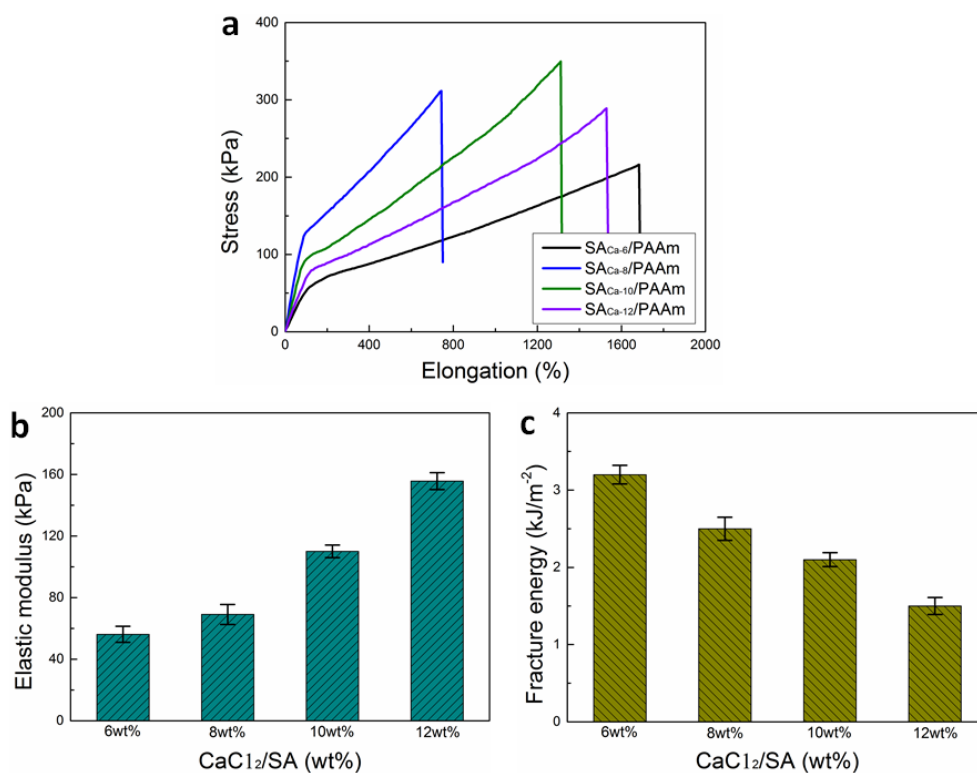

Figure S2. (a) Effects of various CaCl<sub>2</sub> contents on the stress-elongation curves of the SA/PAAm DN hydrogels. Dependences of (b) elastic modulus and (c) fracture energy on CaCl<sub>2</sub> contents.

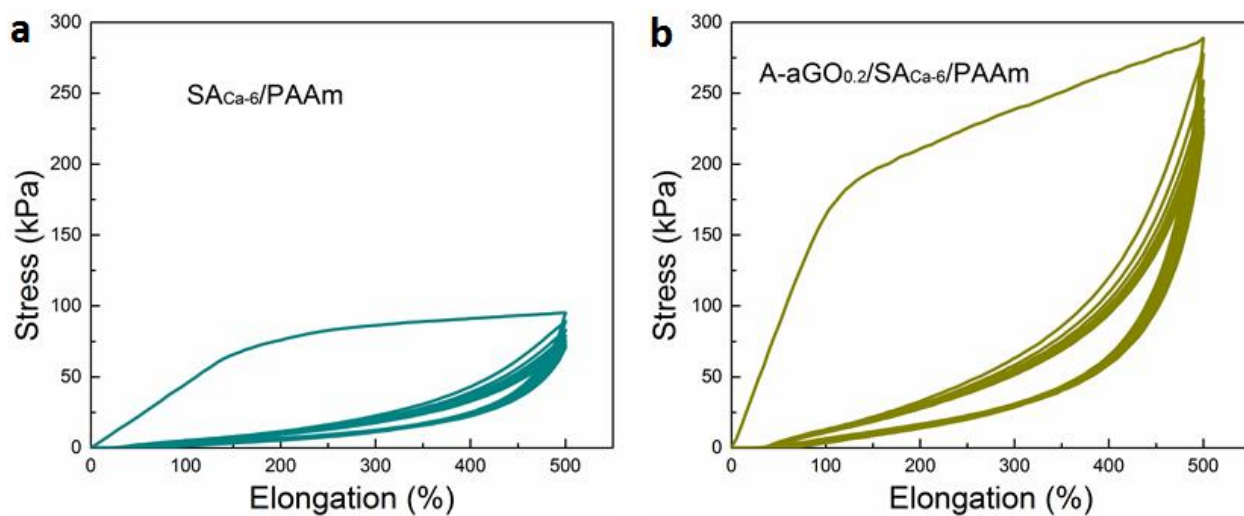

Figure S3. Eight successive loading–unloading cycles for (a) the SACa-6/PAAm DN hydrogel and (b) the A-aGO<sub>0.2</sub>/SACa-6/PAAm nanocomposite hydrogel.

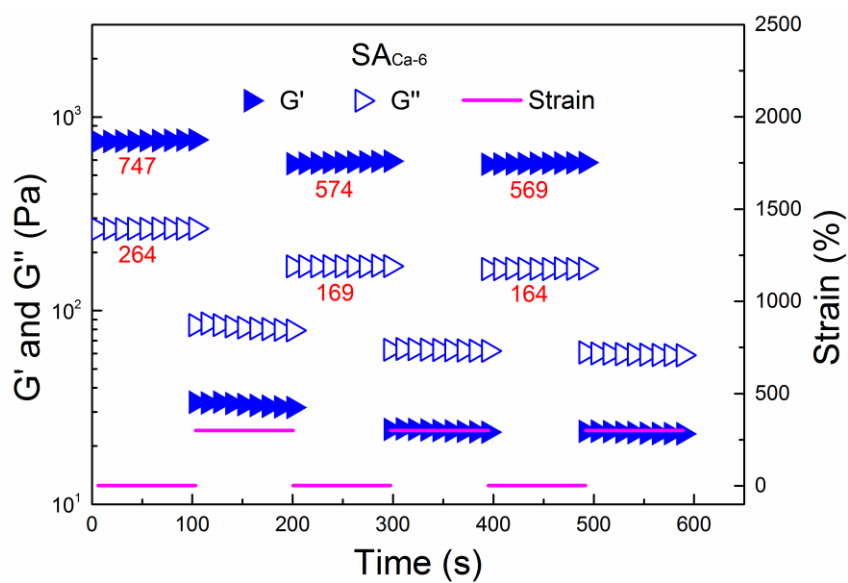

Figure S4. Changes of  $G'$  and  $G''$  with time in alternant oscillation strains of 2 and 300 % for the SACa-6 hydrogel in an angular frequency of 1 Hz, where the red numbers represent the average modulus at the oscillation strain of 2 %.

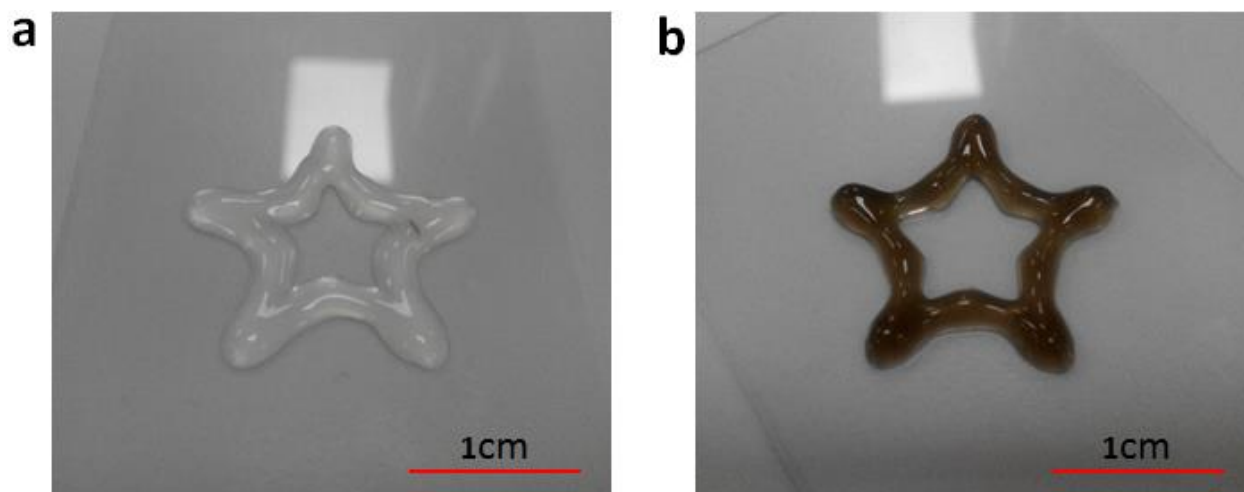

Figure S5. 3D printed hollow pentagon patterns when (a) the  $SA_{Ca-6}/AAm$  hydrogel and (b) the  $GO_{0.2}/SA_{Ca-6}/AAm$  hydrogel respectively were used as the ink of 3D printer.

#### Supplementary Video:

**Video S1.** Compression of 3D printed nanocomposite pyramid sample after UV-curing
